# Supplementary material
Source: PubMed Central journal article supplement (PMC3419791)
Supplement: NIHMS384786-supplement-Figure_S1.pdf [file NIHMS384786-supplement-Figure_S1.pdf]

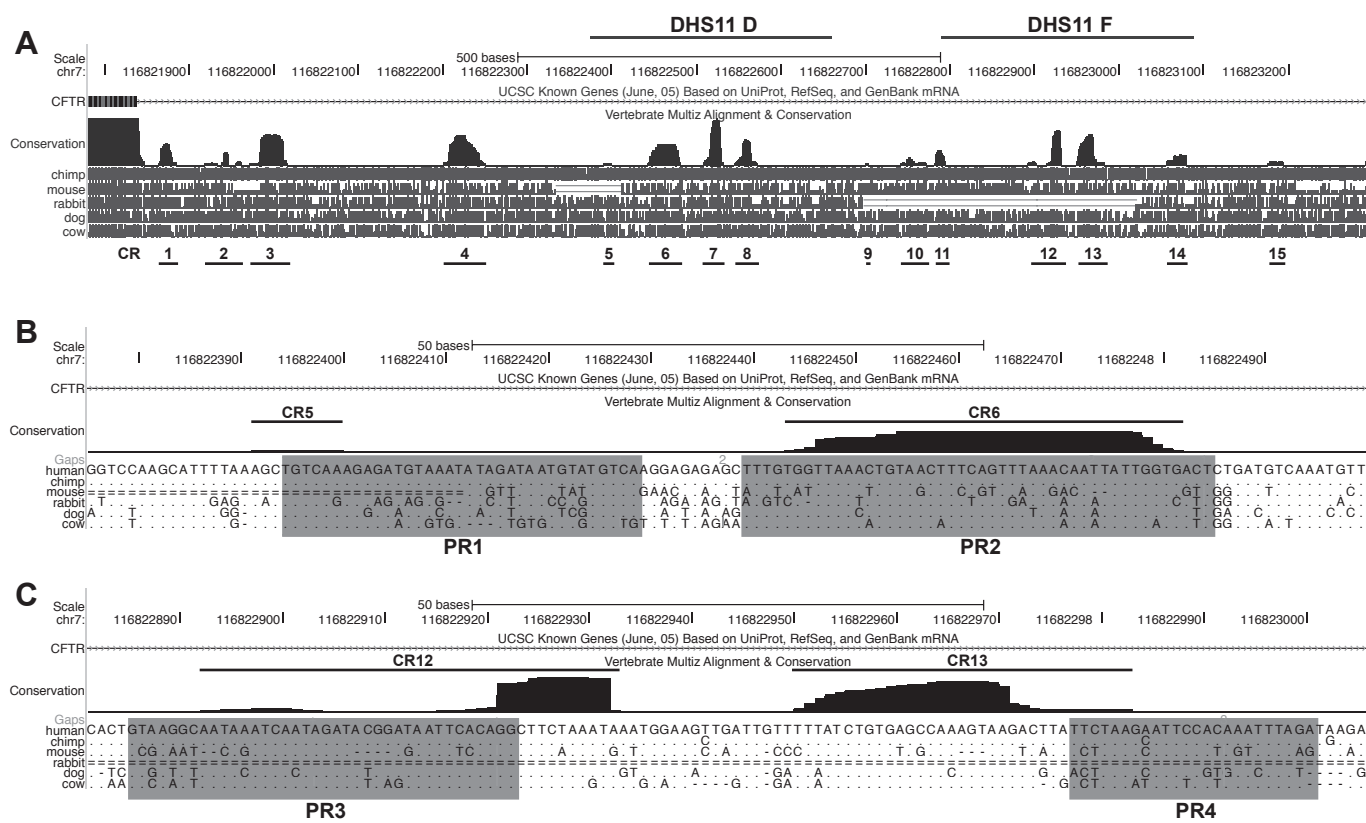

**Fig. S1. Sequence conservation of a DHS region in intron 11 of *CFTR*.** 17 species vertebrate multiz alignment and conservation track from the UCSC genome browser, May 2004 (NCBI35/hg17) assembly (<http://genome.ucsc.edu/>) (31-33) spanning the 1.5 kb DHS11 sequence (A), fragment D (B), and fragment F (C). Fifteen peaks of high conservation, and footprint probes D and F (Figure 1B) are indicated. PRs are shown in relation to the conserved regions (CRs) of the intron 11 DHS element.
