# Supplementary material
Source: PubMed Central journal article supplement (PMC3419791)
Supplement: NIHMS384786-supplement-Figure_S2.pdf [file NIHMS384786-supplement-Figure_S2.pdf]

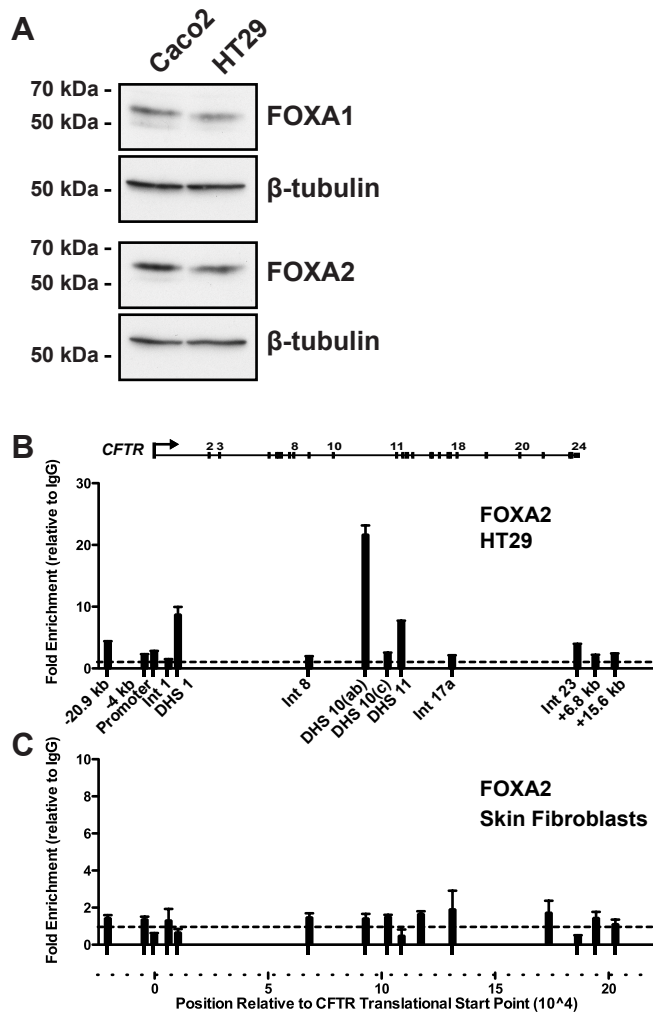

**Fig. S2. FOXA2 is enriched in vivo at *CFTR* regulatory elements in HT29, but not primary skin fibroblasts.** (A) Western blot of Caco2 and HT29 whole cell lysate for FOXA1, FOXA2, or  $\beta$ -tubulin control. Immunoprecipitation of HT29 (B) and primary skin fibroblast (C) chromatin with FOXA2-specific antibody or normal goat IgG. FOXA2 enrichment was detected and analyzed as in Fig 4.
