# Supplementary material
Source: PubMed Central journal article supplement (PMC3419791)
Supplement: NIHMS384786-supplement-Figure_S3.pdf [file NIHMS384786-supplement-Figure_S3.pdf]

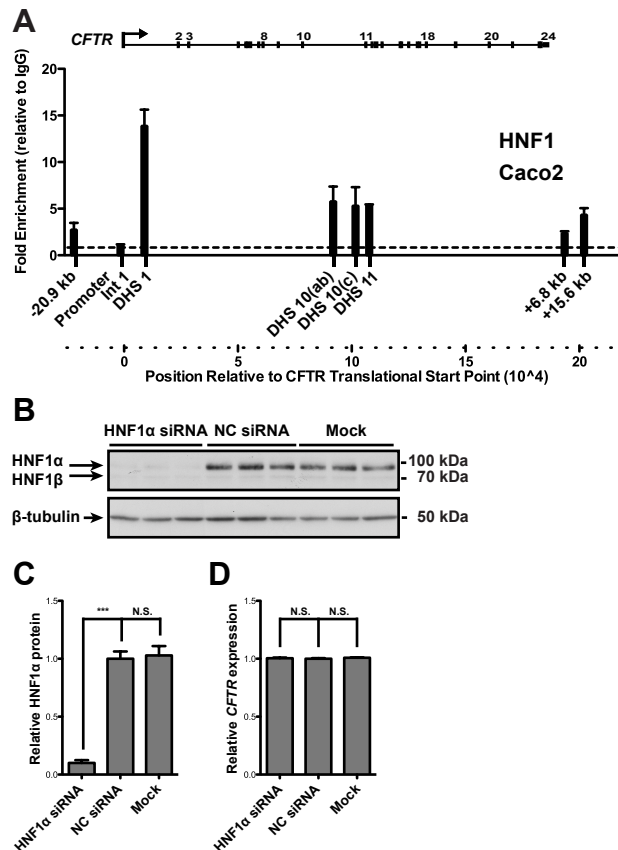

**Fig. S3. HNF1 interacts with *CFTR* regulatory elements but its depletion does not impact *CFTR* expression levels *in vivo*.** (A) Immunoprecipitation of Caco2 chromatin with HNF1-specific antibody or normal rabbit IgG. HNF1 enrichment was detected and calculated as in Fig. 4. (B-D) Caco2 cells were reverse transfected for 48h with negative control siRNA (NC), siRNA targeting HNF1 $\alpha$ , or in the absence of siRNA (mock). (B) Western blot of whole cell lysate for total HNF1 or  $\beta$ -tubulin control. (C) HNF1 protein levels were quantified from three independent experiments; results were normalized to  $\beta$ -tubulin, and are shown relative to the NC sample. (D) *CFTR* mRNA levels measured by Taqman qRT-PCR from total RNA. Results were normalized to 18s rRNA levels, and are shown relative to the NC sample. Error bars represent SEM; n=9; \*\*\* denotes P<0.001 and N.S. denotes not significant, using an unpaired *t*-test.
